# Supplementary material
Source: MDPI journal article supplement (https://www.mdpi.com/2073-4433/12/4/460)
Supplement: s1 [file s1]

# Supplementary Materials: Effectiveness of SO<sub>x</sub>, NO<sub>x</sub>, and Primary Particulate Matter Control Strategies in the Improvement of Ambient PM Concentration in Taiwan

Jiun-Horng Tsai <sup>1,2</sup>, Ming-Ye Lee <sup>1</sup> and Hung-Lung Chiang <sup>3\*</sup>

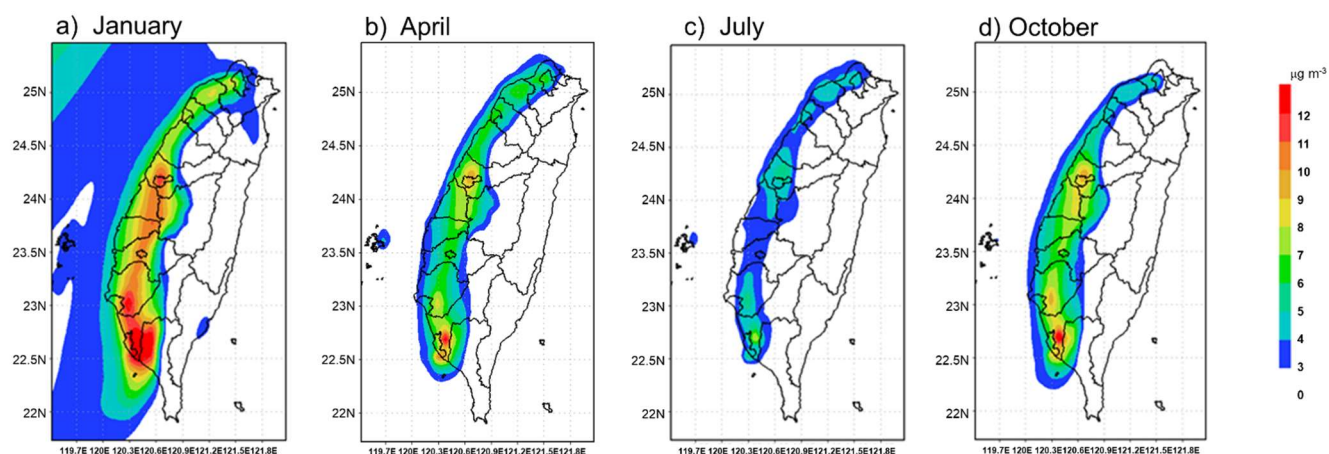

**Figure S1.** The stimulation of primary PM<sub>2.5</sub> concentrations for January (a), April (b), July (c) and October (d) under the baseline year condition.

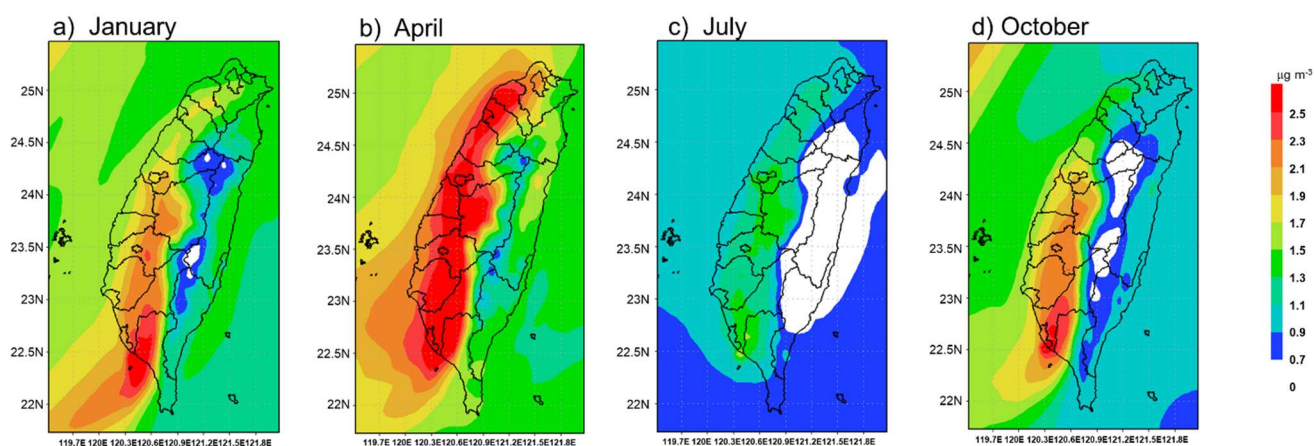

**Figure S2.** The stimulation of sulfate concentrations for January (a), April (b), July (c) and October (d) under the baseline year condition.

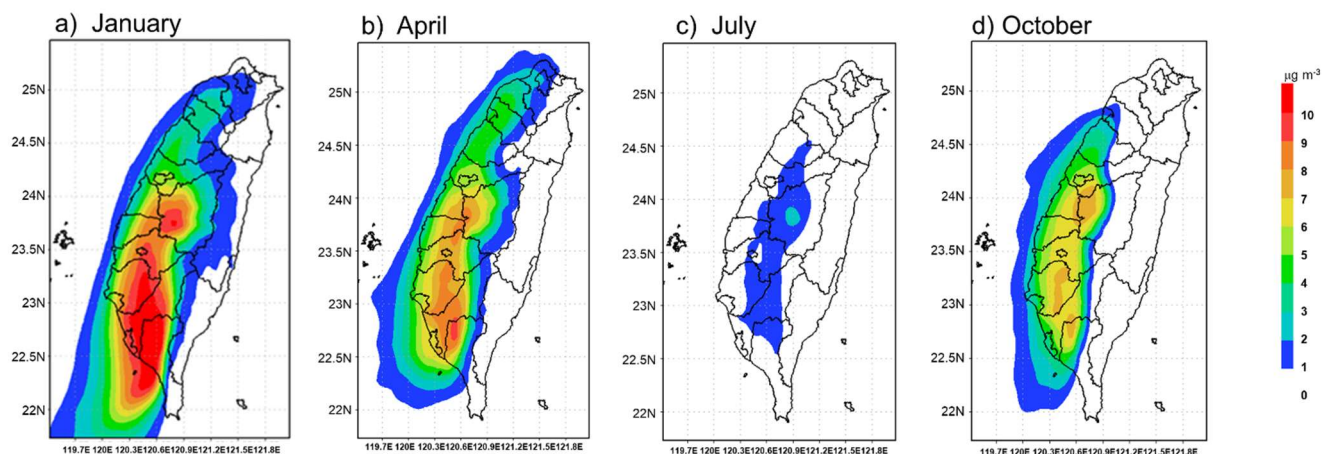

**Figure S3.** The stimulation of nitrate concentrations for January (a), April (b), July (c) and October (d) under the baseline year condition.

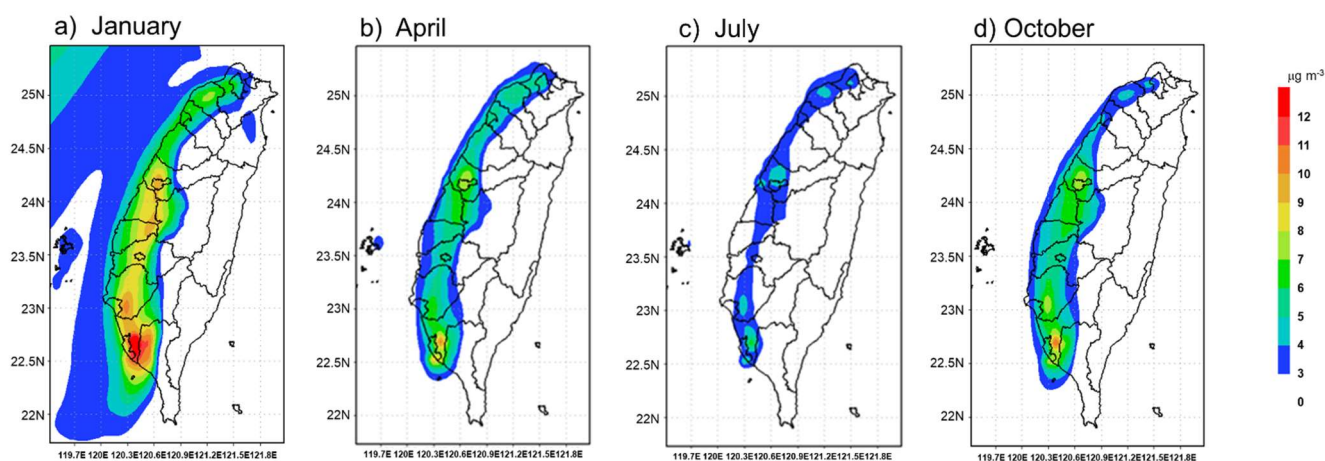

**Figure S4.** The stimulation of primary  $\text{PM}_{2.5}$  concentrations for January (a), April (b), July (c) and October (d) under Scenario II.

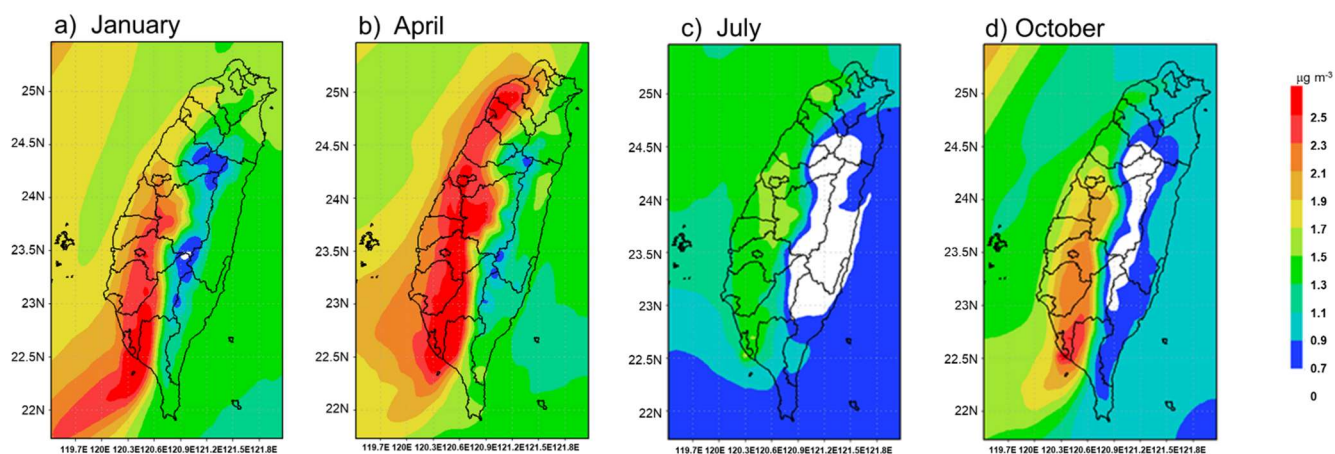

**Figure S5.** The stimulation of sulfate concentrations for January (a), April (b), July (c) and October (d) under the scenario II.

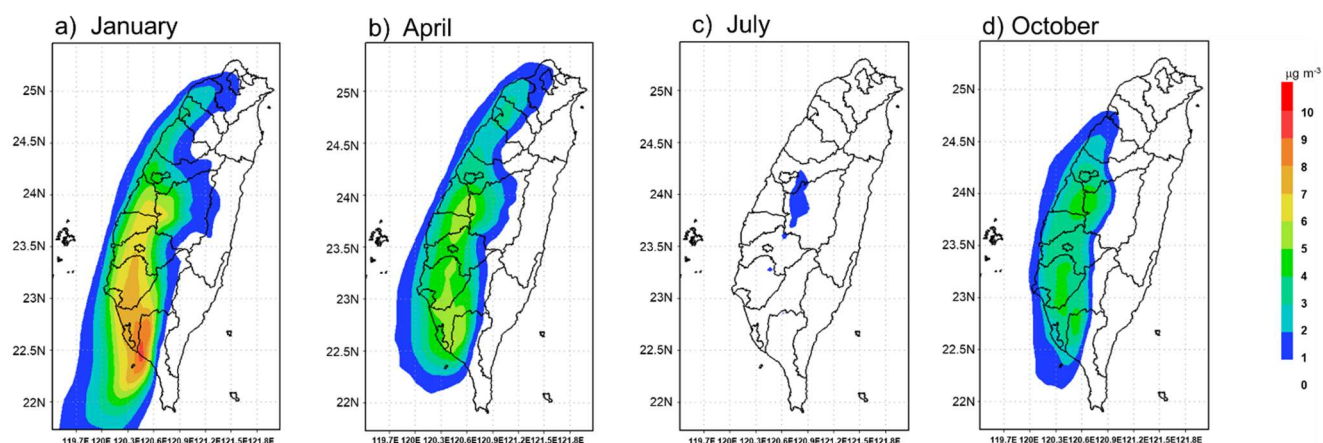

**Figure S6.** The stimulation of nitrate concentrations for January (a), April (b), July (c) and October (d) under Scenario II.

| Pollutants                                  | Scenario II (SII) — Figure. 5 | Scenario III (SIII) — Figure. 6 | Difference between SII and SIII |
|---------------------------------------------|-------------------------------|---------------------------------|---------------------------------|
| PM <sub>2.5</sub><br>(ton y <sup>-1</sup> ) |                               |                                 |                                 |
| SOx<br>(ton y <sup>-1</sup> )               |                               |                                 |                                 |



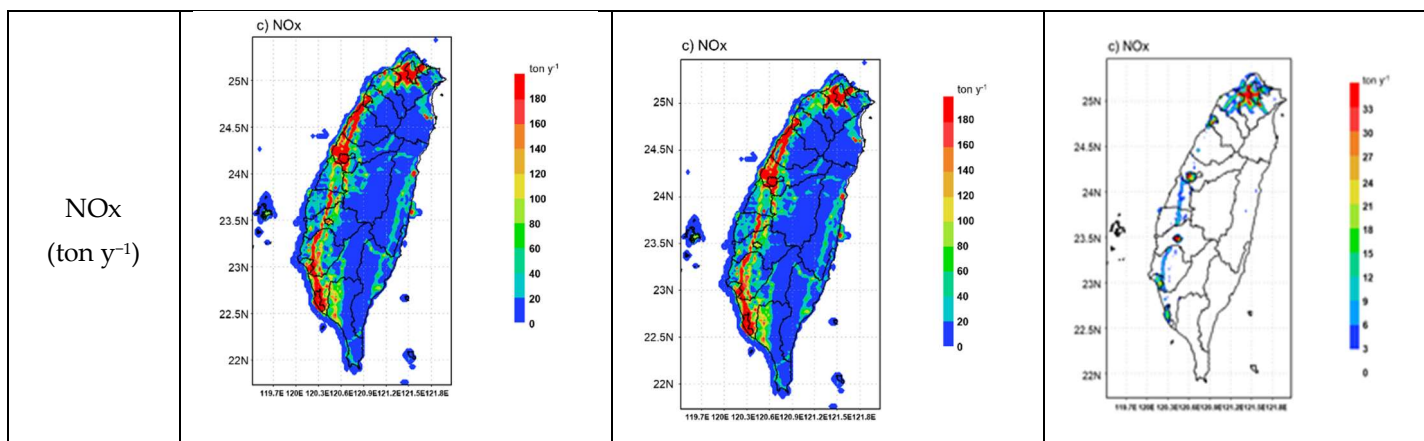

**Figure S7.** Comparison the differences of Scenario II and III. (a) PM<sub>2.5</sub>; (b) Sox; (c) NOx

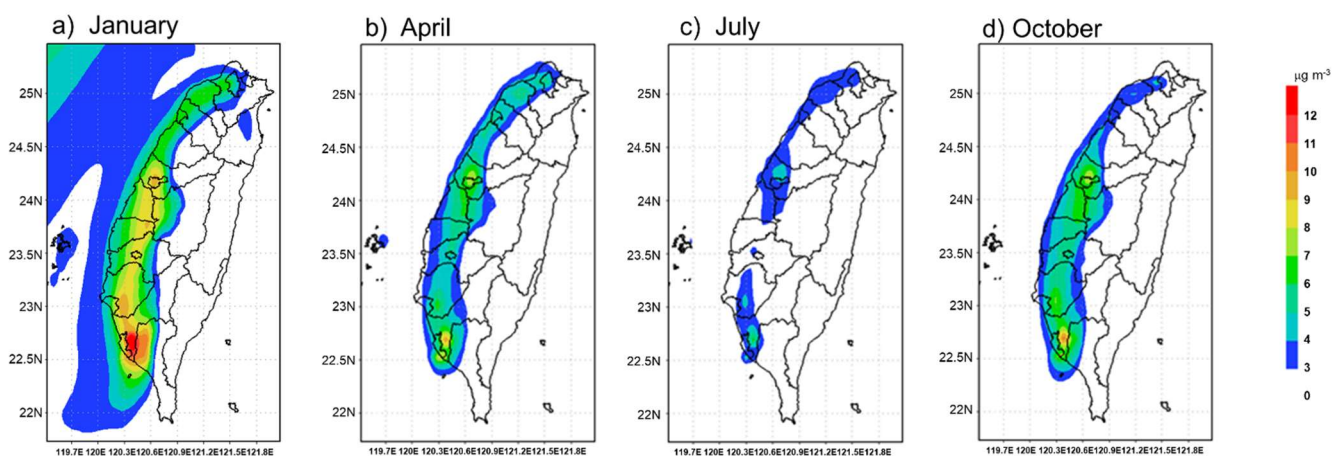

**Figure S8.** The stimulation of Primary PM<sub>2.5</sub> concentrations for January (a), April (b), July (c) and October (d) under the scenario III.

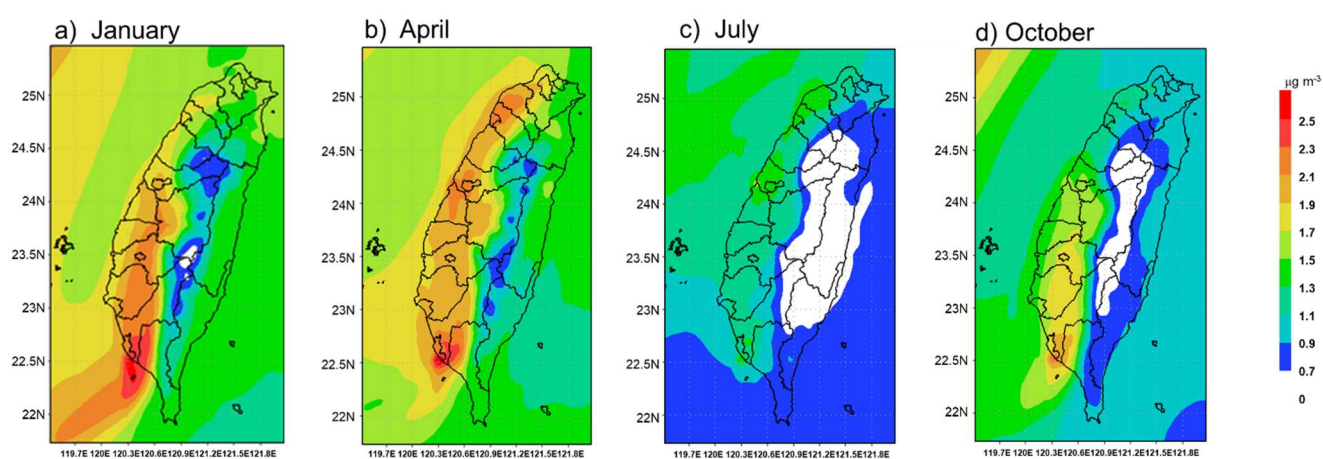

**Figure S9.** The stimulation of sulfate concentrations for January (a), April (b), July (c) and October (d) under the scenario III.

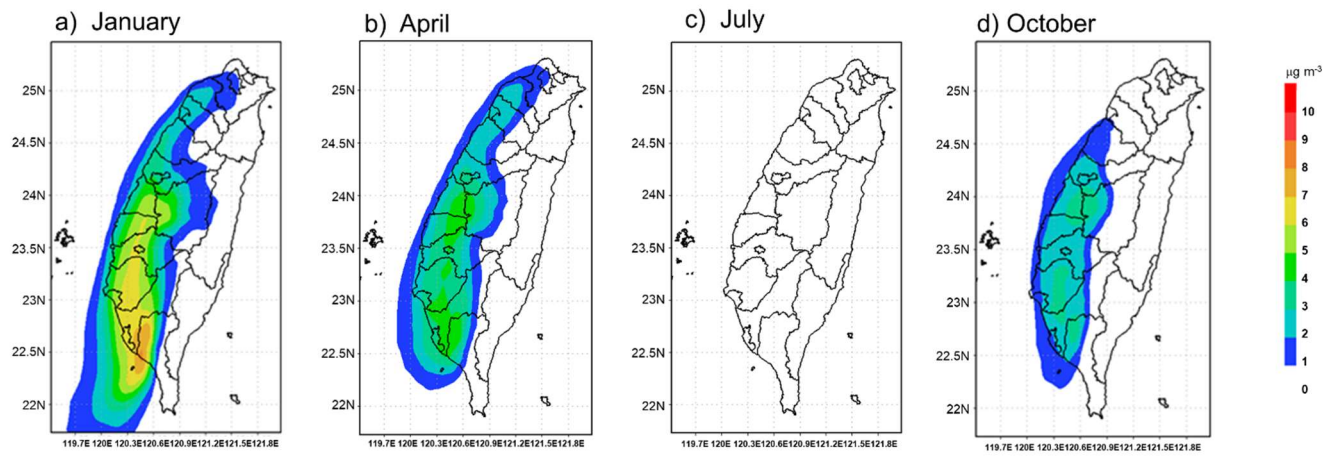

**Figure S10.** The stimulation of Nitrate concentrations for January (a), April (b), July (c) and October (d) under the scenario III.
